# Supplementary material for: Relationship between HER2 expression and efficacy with first-line trastuzumab emtansine compared with trastuzumab plus docetaxel in TDM4450g: a randomized phase II study of patients with previously untreated HER2-positive metastatic breast cancer
Source: Breast Cancer Res. 2014 May 23;16(3):R50. doi: 10.1186/bcr3661 (PMC4229898; doi:10.1186/bcr3661)
Supplement: Additional file 1 — List of institutional review boards and participating study sites. [file bcr3661-S1.xls]

## Sheet: IRBs
IRBs
For Studies: BO21976
Study #	Country	Site #	Main Account	Site Status	PI Last Name	PI First Name	Account	Type	Sub Type	Role	Address	Address 2	Postal Code	City	State	Account Country
BO21976	ARGENTINA	212388	FIDES; ONCOLOGÍA	Follow-Up	Cagnolati	Silvia	CE.LA.BE (Comité de Bioética de la Escuela Latinoamericana de Bioética)	Ethics Committee/IRB	Local Ethic Committee/IRB	Local Ethic Committee/IRB	Calle 68 N° 953	n/a	B1904BAG	La Plata	Buenos Aires	ARGENTINA
BO21976	ARGENTINA	212388	FIDES; ONCOLOGÍA	Follow-Up	Cagnolati	Silvia	Comite Indep. De Etica Para Ensayos En Farmacolog.	Ethics Committee/IRB	Central IRB	Local Ethic Committee/IRB	Pte. J. E. Uriburu 774	1er Piso	C1027AAP	Capital Federal	Buenos Aires	ARGENTINA
BO21976	ARGENTINA	212425	CAIPO	Clinical Closure	PALAZZO	FELIPE	Comite Indep. De Etica Para Ensayos En Farmacolog.	Ethics Committee/IRB	Central IRB	Local Ethic Committee/IRB	Pte. J. E. Uriburu 774	1er Piso	C1027AAP	Capital Federal	Buenos Aires	ARGENTINA
BO21976	ARGENTINA	212425	CAIPO	Clinical Closure	PALAZZO	FELIPE	Teaching and research committee	Ethics Committee/IRB	Local Ethic Committee/IRB	Local Ethic Committee/IRB	Av D Sarmiento 157	n/a	T4000GTB	San Miguel de Tucumán	Tucuman	ARGENTINA
BO21976	ARGENTINA	212415	Instituto Argentino de Diagnóstico y Tratamiento- IADT	Active	Temperley	Guillermo Jose	Comite Indep. De Etica Para Ensayos En Farmacolog.	Ethics Committee/IRB	Central IRB	Local Ethic Committee/IRB	Pte. J. E. Uriburu 774	1er Piso	C1027AAP	Capital Federal	Buenos Aires	ARGENTINA
BO21976	ARGENTINA	212415	Instituto Argentino de Diagnóstico y Tratamiento- IADT	Active	Temperley	Guillermo Jose	IADT ETHICS / Teaching and Research	Ethics Committee/IRB	Local Ethic Committee/IRB	Local Ethic Committee/IRB	Ave. Marcelo T. de Alvear 2346/2400	n/a	C1122AAL	Capital Federal	Buenos Aires	ARGENTINA
BO21976	AUSTRIA	212367	Kaiser-Franz-Josef-Spital; Zent.Onkologie und Hamatologie	Follow-Up	DITTRICH	CHRISTIAN	Ethikkomission der stadt Wien	Ethics Committee/IRB	Local Ethic Committee/IRB	Local Ethic Committee/IRB	Thomas-Klestil-Platz8		1030	Wien		AUSTRIA
BO21976	BELGIUM	212377	Jules Bordet Institute	Follow-Up	AWADA	AHMAD	Comité d'éthique Institut Jules Bordet; Unité de chimiothérapie	Ethics Committee/IRB	Local Ethic Committee/IRB	Local Ethic Committee/IRB	Secrétariat de chimiothérapie, Boulevard de Waterloo 125 (3ème étage)		1000	Brussels		BELGIUM
BO21976	BELGIUM	212364	Cliniques Univ Saint-Luc; Oncology	Follow-Up	BAURAIN	JEAN-FRANCOIS	Commission d'Ethique biomedicale Hospitalo-Facultaire	Ethics Committee/IRB	Central IRB	Local Ethic Committee/IRB	Avenue Hippocrate 55, 14 Tour Harvey - Niv. 0		1200	Bruxelles		BELGIUM
BO21976	BELGIUM	212435	Sint Augustinus	Active	DIRIX	LUC	Sint-Augustinus Commissie voor Medische Ethiek	Ethics Committee/IRB	Local Ethic Committee/IRB	Local Ethic Committee/IRB	OOSTERVELDLAAN 24		2610	WILRIJK		BELGIUM
BO21976	BELGIUM	212438	CLINIQUE STE-ELISABETH; ONCOLOGIE	Follow-Up	Vuylsteke	Peter	Comité d'Ethique de la Clinique & Maternité Ste Elisabeth	Ethics Committee/IRB	Local Ethic Committee/IRB	Local Ethic Committee/IRB	15 PLACE LOUISE GODIN		5000	NAMUR		BELGIUM
BO21976	BRAZIL	212477	CLÍNICA DE NEOPLASIAS LITORAL	Active	Borges	Giuliano	Comissão Nacional de Ética em Pesquisa	Ethics Committee/IRB	Central IRB	Local Ethic Committee/IRB	Esplanada dos Ministérios - Ministério da Saúde	Bloco G - Ed. Anexo, Ala B, 10° andar, Sala 145	79958900	Brasília		BRAZIL
BO21976	BRAZIL	212477	CLÍNICA DE NEOPLASIAS LITORAL	Active	Borges	Giuliano	Comitê de Ética em Pesquisa da Universidade do Vale do Itajaí (UNIVALI)	Ethics Committee/IRB	Local Ethic Committee/IRB	Local Ethic Committee/IRB	Rua Uruguai 458		88301-220	Itajai	SC	BRAZIL
BO21976	BRAZIL	212363	Faculdade De Medicina Do ABC	Follow-Up	Cruz	Felipe José	Comissão Nacional de Ética em Pesquisa	Ethics Committee/IRB	Central IRB	Local Ethic Committee/IRB	Esplanada dos Ministérios - Ministério da Saúde	Bloco G - Ed. Anexo, Ala B, 10° andar, Sala 145	79958900	Brasília		BRAZIL
BO21976	BRAZIL	212363	Faculdade De Medicina Do ABC	Follow-Up	Cruz	Felipe José	Comitê de Ética em Pesquisa da Faculdade de Medicina do ABC	Ethics Committee/IRB	Local Ethic Committee/IRB	Local Ethic Committee/IRB	Avenida Lauro Gome, 2000 - Vila Sacadora Cabral		09060-870	Santo Andre	SP	BRAZIL
BO21976	BRAZIL	212476	Hosp. Sao Lucas - FMPUCRS	Follow-Up	Escosteguy Barrios	Carlos Henrique	Comissão Nacional de Ética em Pesquisa	Ethics Committee/IRB	Central IRB	Local Ethic Committee/IRB	Esplanada dos Ministérios - Ministério da Saúde	Bloco G - Ed. Anexo, Ala B, 10° andar, Sala 145	79958900	Brasília		BRAZIL
BO21976	BRAZIL	212476	Hosp. Sao Lucas - FMPUCRS	Follow-Up	Escosteguy Barrios	Carlos Henrique	Comitê de Ética em Pesquisa da PUCRS	Ethics Committee/IRB	Local Ethic Committee/IRB	Local Ethic Committee/IRB	Av Ipiranga, 6681 Predio 09, Partenon			Porto Alegre	RS	BRAZIL
BO21976	BRAZIL	212427	Inst Etica - Ensino e Terapia	Clinical Closure	Sampaio Pereira Filho	Carlos Alberto	Comissão Nacional de Ética em Pesquisa	Ethics Committee/IRB	Central IRB	Local Ethic Committee/IRB	Esplanada dos Ministérios - Ministério da Saúde	Bloco G - Ed. Anexo, Ala B, 10° andar, Sala 145	79958900	Brasília		BRAZIL
BO21976	BRAZIL	212427	Inst Etica - Ensino e Terapia	Clinical Closure	Sampaio Pereira	Carlos Alberto	Comitê de Ética em Pesquisa em Seres Humanos da Maternidade Climério de Oliveira	Ethics Committee/IRB	Local Ethic Committee/IRB	Local Ethic Committee/IRB	R. Padre Feijó, 240		40110-170	Salvador	BA	BRAZIL
BO21976	BRAZIL	212339	Clinica de Oncologia	Follow-Up	VINHOLES	JEFERSON	Comissão Nacional de Ética em Pesquisa	Ethics Committee/IRB	Central IRB	Local Ethic Committee/IRB	Esplanada dos Ministérios - Ministério da Saúde	Bloco G - Ed. Anexo, Ala B, 10° andar, Sala 145	79958900	Brasília		BRAZIL
BO21976	BRAZIL	212339	Clinica de Oncologia	Follow-Up	VINHOLES	JEFERSON	Comitê de Ética em Pesquisa do Hospital Moinhos de Vento	Ethics Committee/IRB	Local Ethic Committee/IRB	Local Ethic Committee/IRB	Rua Ramiro Barcelos, 910		90035-001	Porto Alegre	RS	BRAZIL
BO21976	BRAZIL	212340	Hospital Luxemburgo	Active	Wainstein	Alberto Julius	Comissão Nacional de Ética em Pesquisa	Ethics Committee/IRB	Central IRB	Local Ethic Committee/IRB	Esplanada dos Ministérios - Ministério da Saúde	Bloco G - Ed. Anexo, Ala B, 10° andar, Sala 145	79958900	Brasília		BRAZIL
BO21976	BRAZIL	212340	Hospital Luxemburgo	Active	Wainstein	Alberto Julius	Comitê de Ética em Pesquisa da Fundação Mário Penna - Hospital Luxemburgo	Ethics Committee/IRB	Local Ethic Committee/IRB	Local Ethic Committee/IRB	Rua Gentios, 1350 - Luxemburgo		30380-490	Belo Horizonte	MG	BRAZIL
BO21976	CHILE	212416	Fundacion Arturo Lopez Perez	Follow-Up	Mahave Caceres	Mauricio	Comite de Etica Servicio de Salud Metropolitano Oriente	Ethics Committee/IRB	Central IRB	Local Ethic Committee/IRB	Av. Salvador 364, Providencia		7500922	Santiago		CHILE
BO21976	CHILE	212414	Instituto Oncologico del sur	Follow-Up	Yanez	Eduardo	Comité de Ética Cientifico del Servicio de Salud Araucania Sul	Ethics Committee/IRB	Local Ethic Committee/IRB	Local Ethic Committee/IRB	Vicuña Mackenna, 51		4781086	Temuco		CHILE
BO21976	GERMANY	212409	Schwarzwald-Baar Klinikum GmbH	Follow-Up	BRUGGER	WOLFRAM	Ethik-Kommission der Albert-Ludwigs-Universität Freiburg	Ethics Committee/IRB	Local Ethic Committee/IRB	Local Ethic Committee/IRB	Elsässer Str. 2 m, Haus 1A,		79110	Freiburg		GERMANY
BO21976	GERMANY	212405	Universitaetsfrauenklinik; Und Poliklinik Am Klinikum	Follow-Up	GERBER	BERND	Ethik-Kommission Rostock, Institut für Rechtsmedizin	Ethics Committee/IRB	Central IRB	Local Ethic Committee/IRB	St. Georg-Straße 108,		18055	Rostock		GERMANY
BO21976	GERMANY	212406	Gemeinschaftspraxis	Follow-Up	HEINRICH	BERNHARD	Ethik-Kommission der Bayerischen Landesärztekammer	Ethics Committee/IRB	Local Ethic Committee/IRB	Local Ethic Committee/IRB	Mühlbaurstr. 16		81677	München		GERMANY
BO21976	GERMANY	212402	Frauenklinik d Medizinishchen	Active	Park-Simon	Tjoung-Won	Ethik-Kommission der Medizinischen Hochschule Hannover	Ethics Committee/IRB	Local Ethic Committee/IRB	Local Ethic Committee/IRB	Carl-Neuberg-Str. 1		30625	Hannover		GERMANY
BO21976	GERMANY	212437	St.-Vincentius-Kliniken Klinik f.Frauenheilkunde Hebammenlehranstalt	Active	Tome	Oliver	EK Baden-Württemberg LÄK	Ethics Committee/IRB	Local Ethic Committee/IRB	Local Ethic Committee/IRB	Jahnstr. 40		70597	Stuttgart		GERMANY
BO21976	HUNGARY	212389	Semmelweis University; Diagnostic Radiology and Oncotherapy	Active	DANK	MAGDOLNA	Medical Research Council, Ethics Committee for Clinical Pharmacology	Ethics Committee/IRB	Central IRB	Local Ethic Committee/IRB	Arany János u. 6-8.		1051	Budapest		HUNGARY
BO21976	HUNGARY	212390	Semmelweis Univ Hospital	Follow-Up	Kocsis	Judit	Medical Research Council, Ethics Committee for Clinical Pharmacology	Ethics Committee/IRB	Central IRB	Local Ethic Committee/IRB	Arany János u. 6-8.		1051	Budapest		HUNGARY
BO21976	HUNGARY	212391	Markusovszky Hospital	Active	Wenczl	Miklos	Medical Research Council, Ethics Committee for Clinical Pharmacology	Ethics Committee/IRB	Central IRB	Local Ethic Committee/IRB	Arany János u. 6-8.		1051	Budapest		HUNGARY
BO21976	ISRAEL	212398	KAPLAN MEDICAL CENTER; ONCOLOGY INST.	Follow-Up	Efrat	Noa	Helsinki Committee - Kaplan	Ethics Committee/IRB	Local Ethic Committee/IRB	Local Ethic Committee/IRB	Kaplan Medical Center		76100	Rehovot		ISRAEL
BO21976	ISRAEL	212393	Assaf Harofeh Medical Center	Follow-Up	EVRON	ELLA	Helsinki Committee- Assaf Harofeh	Ethics Committee/IRB	Local Ethic Committee/IRB	Local Ethic Committee/IRB	Assaf Harofeh Medical Center		70300	Zerifin		ISRAEL
BO21976	ISRAEL	212400	SHAARE ZEDEK MEDICAL CENTER; ONCOLOGY DEPT	Active	GABIZON	ALBERTO	Helsinki Committee- Shaare Zedek	Ethics Committee/IRB	Local Ethic Committee/IRB	Local Ethic Committee/IRB	Shaare Zedek Medical Center P.O.B. 3235		91031	Jerusalem		ISRAEL
BO21976	ISRAEL	212396	Western Galilee Hospital; Oncology-Nahariya	Follow-Up	Goldberg	Hadassah	Helsinki Committee- Western Galilee	Ethics Committee/IRB	Local Ethic Committee/IRB	Local Ethic Committee/IRB	Western Galilee Hospital		22100	Naharia		ISRAEL
BO21976	ISRAEL	212397	Tel Aviv Sourasky Medical Ctr; Oncology	Follow-Up	INBAR	MOSHE	Sourasky Medical Centre Ethics Committee	Ethics Committee/IRB	Local Ethic Committee/IRB	Local Ethic Committee/IRB	6 WEIZMANN STREET		64239	TEL AVIV		ISRAEL
BO21976	ISRAEL	212411	Hadassah Med Org Kiryat; Oncology Institute	Active	UZIELY	BEATRICE	Helsinky committee Hadassah EK	Ethics Committee/IRB	Local Ethic Committee/IRB	Local Ethic Committee/IRB	Hadassah Ein Karem MC	P.O.B 12000	91120	Jerusalem		ISRAEL
BO21976	ISRAEL	212395	MEIR MEDICAL CENTER; ONCOLOGY	Follow-Up	Ygael	Dror	Helsinki Committee - Meir	Ethics Committee/IRB	Local Ethic Committee/IRB	Local Ethic Committee/IRB	Meir M.C., 59, Tschernichovsky		44281	Kfar Saba		ISRAEL
BO21976	ITALY	212408	Istituto Nazionale dei Tumori; Medicina Oncol	Follow-Up	Bianchi	Giulia	Comitato Etico Indipendente della Fondazione IRCCS Istituto Nazionale dei Tumori di Milano	Ethics Committee/IRB	Central IRB	Local Ethic Committee/IRB	Via Giacomo Veneziani 1		20133	Milano		ITALY
BO21976	ITALY	212365	POLICLINICO DI MODENA; DEPT. DI ONCOLOGIA ED EMATOLOGIA	Follow-Up	CONTE	PIER FRANCO	Comitato Etico Provinciale Modena	Ethics Committee/IRB	Local Ethic Committee/IRB	Local Ethic Committee/IRB	Via Largo Del Pozzo, 71		41124	Modena		ITALY
BO21976	ITALY	212366	Istituto Europeo Di Oncologia	Follow-Up	GOLDHIRSCH	ARON	Comitato Etico Istituto Europeo di Oncologia	Ethics Committee/IRB	Local Ethic Committee/IRB	Local Ethic Committee/IRB	VIA RIPAMONTI 435		20141	MILANO		ITALY
BO21976	ITALY	212381	Azienda Ospedaliera Univ di Udine; Oncologia Medica	Active	MUSOLINO	ANTONINO	Comitato Etico Unico Per La Provincia Di Parma	Ethics Committee/IRB	Local Ethic Committee/IRB	Local Ethic Committee/IRB	Via Gramsci 14		43126	Parma		ITALY
BO21976	MEXICO	212429	Instituto Nacional de Cancer	Active	Arce-Salinas	Claudia	Comité de Etica del Instituto Nacional de Cancerologia	Ethics Committee/IRB	Local Ethic Committee/IRB	Local Ethic Committee/IRB	Avenida San Fernando No 22		14080	Mexico city	DF	MEXICO
BO21976	MEXICO	212428	TRIVA Investigaciones Medicas	Follow-Up	Trigueros-Velazquez	Mario	Comité de Investigacion del Hospital Star Medica	Ethics Committee/IRB	Local Ethic Committee/IRB	Local Ethic Committee/IRB	Hospital Star Medica	Virrey de Mendoza, N° 2000 Colonia Feliz Ireta	58070	Morelia	Michoacan	MEXICO
BO21976	PERU	21675	Instituto Oncologico Miraflore	Active	CASANOVA	LUIS	Comité Institucional de Ética en Investigación de la Universidad San Martín de Porres - Clínica CADAMUJER	Ethics Committee/IEC	Central IRB	Local Ethic Committee/IRB	Av. Alameda del Correguidor N° 1531	Urb. Los Sirius – La Molina	12	Lima		PERU
BO21976	PERU	21676	Hospital Nacional Edgardo Rebagliati Martins	Follow-Up	Hurtado de Mendoza	Jose	Comité de Etica del Hospital Nacional Edgardo Rebagliati Martins	Ethics Committee/IRB	Local Ethic Committee/IRB	Local Ethic Committee/IRB	Av. Edgardo Rebagliati 490	Lima 11 Peru	Lima 11	Lima		PERU
BO21976	SPAIN	212346	HOSPITAL DE CRUCES; ONCOLOGY	Follow-Up	Lopez Vivanco	Guillermo	CEIC Hospital de Cruces	Ethics Committee/IRB	Local Ethic Committee/IRB	Local Ethic Committee/IRB	5ª planta del Pabellón de Administración (Epidemiología Clínica).	Plaza de Cruces nº 12	48903	Barakaldo, Bizkaia		SPAIN
BO21976	SPAIN	212346	HOSPITAL DE CRUCES; ONCOLOGY	Follow-Up	Lopez Vivanco	Guillermo	Comité Ético de Investigación Clínica de La Comunidad Autónoma del País Vasco (CEIC-E)	Ethics Committee/IRB	Local Ethic Committee/IRB	Local Ethic Committee/IRB	Dirección de Farmacia	C/ Donostia-San Sebastián, 1	01010	Vitoria	ALAVA	SPAIN
BO21976	SPAIN	212362	HOSPITAL CLÍNICO UNIV. LOZANO BLESA; ONCOLOGY	Clinical Closure	Mayordomo Camara	Jose Ignacio	Comité Ético de Investigación Clínica de Aragón	Ethics Committee/IRB	Local Ethic Committee/IRB	Local Ethic Committee/IRB	Avda Gómez Laguna 25		50009	Zaragoza		SPAIN
BO21976	SPAIN	212373	Hospital Universitario La Fe	Follow-Up	Santaballa Bertran	Ana	CEIC Hospital La Fe de Valencia	Ethics Committee/IRB	Central IRB	Local Ethic Committee/IRB	Edifio de la Escuela de Infermeria	6 Planta Despacho 613 Avda. Campanar, 21	46009	Valencia		SPAIN
BO21976	UNITED KINGDOM	212375	The Christie Hosp NHS Trust; Medical Oncology	Follow-Up	Armstrong	Anne	Oxfordshire REC	Ethics Committee/IRB		Local Ethic Committee/IRB	2nd Floor, Astral House	Chaucer Business Park, Granville Way	OX26 4JT	Bicester		UNITED KINGDOM
BO21976	UNITED KINGDOM	212375	The Christie Hosp NHS Trust; Medical Oncology	Follow-Up	Armstrong	Anne	South Manchester Local Research Ethics Committee	Ethics Committee/IRB	Local Ethic Committee/IRB	Local Ethic Committee/IRB	Room 181	Gateway House Piccadilly South	M60 7LP	Manchester		UNITED KINGDOM
BO21976	UNITED STATES	212351	PALM BEACH INST. OF HEMATOLOGY & ONCOLOGY	Clinical Closure	ARMAS	ARMANDO	Copernicus Group IRB	Ethics Committee/IRB	Central IRB	Local Ethic Committee/IRB	One Triangle Drive	Suite 100	27709	Research Triangle Park	NC	UNITED STATES
BO21976	UNITED STATES	212420	Cancer Center Oncology Medical Group	Follow-Up	CHAN	DAVID	Western Institutional Review Board WIRB Panel 12	Ethics Committee/IRB	Central IRB	Local Ethic Committee/IRB	3535 Seventh Ave., SW	PO Box 12029	98502-5010	Olympia	WA	UNITED STATES
BO21976	UNITED STATES	212335	RUSH UNIVERSITY MEDICAL CENTER	Follow-Up	COBLEIGH	MELODY	Rush University Medical Center RCTA	Ethics Committee/IRB	Local Ethic Committee/IRB	Local Ethic Committee/IRB	1653 W. Congress Parkway		60612-3833	Chicago	IL	UNITED STATES
BO21976	UNITED STATES	212419	West Valley Hematology Oncology The Thomas and Dorothy Leavey Cancer Center	Follow-Up	DAVIDSON	SHELDON	Northridge Hospital Medical Center Institutional Review Board, (NHMC IRB)	Ethics Committee/IRB	Central IRB	Local Ethic Committee/IRB	18300 Roscoe Blvd.		91328	Northridge	CA	UNITED STATES
BO21976	UNITED STATES	212432	CENTRAL COAST MEDICAL ONCOLOGY	Active	DICHMANN	ROBERT	Western Institutional Review Board WIRB Panel 12	Ethics Committee/IRB	Central IRB	Local Ethic Committee/IRB	3535 Seventh Ave., SW	PO Box 12029	98502-5010	Olympia	WA	UNITED STATES
BO21976	UNITED STATES	212348	Christiana Care Health Srvcs	Active	GUARINO	MICHAEL	Christiana Care Health System IRB; Helen F. Graham Cancer Center	Ethics Committee/IRB	Local Ethic Committee/IRB	Local Ethic Committee/IRB	4701 Ogletown-Stanton Road, Suite 2350	West Pavilion	19713	Newark	DE	UNITED STATES
BO21976	UNITED STATES	212336	UCLA Oncology Office; Oncology	Active	Hurvitz	Sara	UCLA Office of the Human Research Protection Program	Ethics Committee/IRB	Local Ethic Committee/IRB	Local Ethic Committee/IRB	11000 Kinross Avenue	Box 951694	90095-1694	Los Angeles	CA	UNITED STATES
BO21976	UNITED STATES	212350	Siouxland Hematology/Oncology	Clinical Closure	Kahanic	Stephen	Siouxland Institutional Review Board	Ethics Committee/IRB	Local Ethic Committee/IRB	Local Ethic Committee/IRB	230 Nebraska Street	PO Box 5017	51102	Sioux City	IA	UNITED STATES
BO21976	UNITED STATES	212358	Stony Brook Univ Cancer Ctr	Follow-Up	Kudelka	Andrzej	Committee on Research Involving Human Subjects	Ethics Committee/IRB	Local Ethic Committee/IRB	Local Ethic Committee/IRB	Office of the VP for Research	Frank Melville Memorial Library SUNY @ Stony Brook	11794	Stony Brook	NY	UNITED STATES
BO21976	UNITED STATES	212355	Nebraska Methodist Hospital; Onc Hem West	Follow-Up	LANGDON	ROBERT	Nebraska Methodist Hospital IRB	Ethics Committee/IRB	Local Ethic Committee/IRB	Local Ethic Committee/IRB	8303 Dodge Street		68114	Omaha	NE	UNITED STATES
BO21976	UNITED STATES	212336	COMPREHENSIVE CANCER CENTERS OF THE DESERT HOSPITAL	Clinical Closure	Leichman	Larry	Desert Regional Medical Center Institutional Review Board	Ethics Committee/IRB	Local Ethic Committee/IRB	Local Ethic Committee/IRB	1150 North Canyon Drive		92262	Palm Springs	CA	UNITED STATES
BO21976	UNITED STATES	212338	Carolinas Hem-Oncology Assoc	Follow-Up	LIMENTANI	STEVEN	Carolinas Healthcare Systems IRB	Ethics Committee/IRB	Local Ethic Committee/IRB	Local Ethic Committee/IRB	1000 Blythe Boulevard		28203	Charlotte	NC	UNITED STATES
BO21976	UNITED STATES	212353	MAYO CLINIC JACKSONVILLE	Follow-Up	Moreno-Aspitia	Alvaro	Mayo Clinic Institutional Rev Bd Rochester	Ethics Committee/IRB	Local Ethic Committee/IRB	Local Ethic Committee/IRB	200 First Street SW	201 Building, Room 4-60	55905	Rochester	MN	UNITED STATES
BO21976	UNITED STATES	212359	Univ of Alabama at Birmingham; UAB Comprehensive Cancer Ctr	Clinical Closure	Nabell	Lisle Marie	Western Institutional Review Board	Ethics Committee/IRB	Central IRB	Local Ethic Committee/IRB	3535 Seventh Ave., SW	PO Box 12029	98502-5010	Olympia	WA	UNITED STATES
BO21976	UNITED STATES	212361	BAYLOR COLLEGE OF MEDICINE	Clinical Closure	Rimawi	Mothaffar	Baylor College of Medicine; Institutional Review Board	Ethics Committee/IRB	Local Ethic Committee/IRB	Local Ethic Committee/IRB	One Baylor Plaza	BCM 310	77030	Houston	TX	UNITED STATES
BO21976	UNITED STATES	212337	ST. LOUIS CANCER & BREAST INST.	Clinical Closure	SLECKMAN	BETHANY G.	Copernicus Group IRB	Ethics Committee/IRB	Central IRB	Local Ethic Committee/IRB	One Triangle Drive	Suite 100	27709	Research Triangle Park	NC	UNITED STATES
BO21976	UNITED STATES	212337	ST. LOUIS CANCER & BREAST INST.	Clinical Closure	SLECKMAN	BETHANY G.	Mercy Hospital St. Louis IRB	Ethics Committee/IRB	Local Ethic Committee/IRB	Local Ethic Committee/IRB	615 South New Ballas Road		63149	Saint Louis	MO	UNITED STATES
BO21976	UNITED STATES	212422	St. Joseph Mercy Hospital; Cancer Care Center.	Clinical Closure	STELLA	PHILLIP	St. Joseph Mercy Health System Clinical Research Committee	Ethics Committee/IRB	Local Ethic Committee/IRB	Local Ethic Committee/IRB	5301 East Huron River Drive	PO Box 995	48106-0995	Ann Arbor	MI	UNITED STATES
BO21976	UNITED STATES	212421	Comp Cancer Centers of Nevada	Follow-Up	Thummala	Anu	Western Institutional Review Board WIRB Panel 12	Ethics Committee/IRB	Central IRB	Local Ethic Committee/IRB	3535 Seventh Ave., SW	PO Box 12029	98502-5010	Olympia	WA	UNITED STATES
BO21976	UNITED STATES	212354	UNI OF MARYLAND; GREENEBAUM CANCER CENTER	Follow-Up	TKACZUK	KATHERINE	Human Research Protections Office; University of Maryland School of Medicine	Ethics Committee/IRB	Local Ethic Committee/IRB	Local Ethic Committee/IRB	UMB BioPark, Building One	800 West Baltimore Street, Suite 100	21201	BALTIMORE	MD	UNITED STATES
BO21976	UNITED STATES	212352	The Providence Regional Medical Center Everett	Follow-Up	Wang	Xiaowen	Western Institutional Review Board WIRB Panel 7	Ethics Committee/IRB	Central IRB	Local Ethic Committee/IRB	3535 Seventh Ave., SW	PO Box 12029	98502-5010	Olympia	WA	UNITED STATES
BO21976	UNITED STATES	212344	MAINE CENTER FOR CANCER MEDICINE	Clinical Closure	WEISBERG	TRACEY F.	Copernicus Group IRB	Ethics Committee/IRB	Central IRB	Local Ethic Committee/IRB	One Triangle Drive	Suite 100	27709	Research Triangle Park	NC	UNITED STATES
BO21976	UNITED STATES	212349	University of Minnesota	Follow-Up	Yee	Douglas	University of Minnesota - Research Subjects' Protection Programs	Ethics Committee/IRB	Local Ethic Committee/IRB	Local Ethic Committee/IRB	420 Delaware Street SE	D-528 Mayo Memorial Building	55455	Minneapolis	MN	UNITED STATES
site enrolled/randomized subjects
